# Supplementary material for: Rheological properties and failure of alginate hydrogels with ionic and covalent crosslinks
Source: Royal Society of Chemistry journal article supplement (doi:10.1039/c9sm01039d), 2019-01-01
Supplement: c9sm01039d1.pdf [file c9sm01039d1.pdf]

**Electronic Supplementary Information (ESI) for**

**Rheological properties and failure of alginate hydrogels with  
ionic and covalent crosslinks**

*Seyed Meysam Hashemnejad and Santanu Kundu\**

*Dave C. Swalm School of Chemical Engineering, Mississippi State University,*

*MS State, MS, 39762, USA*

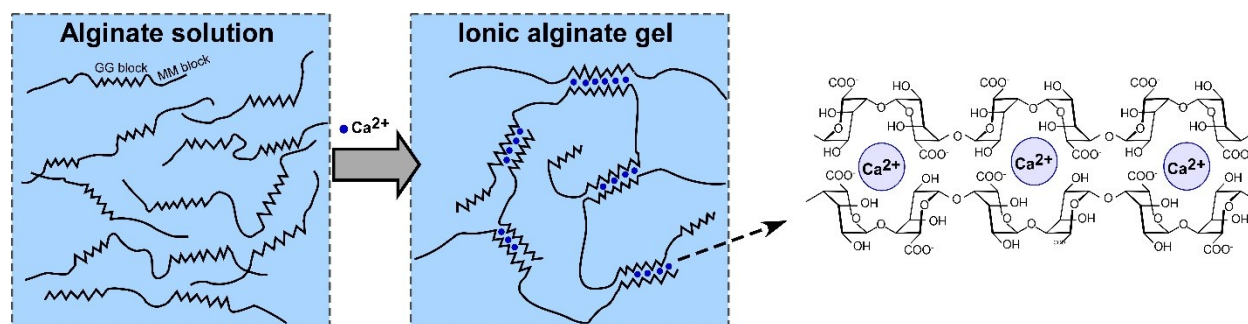

**Figure S1** Schematic of gelation mechanism in ionic alginate gel.

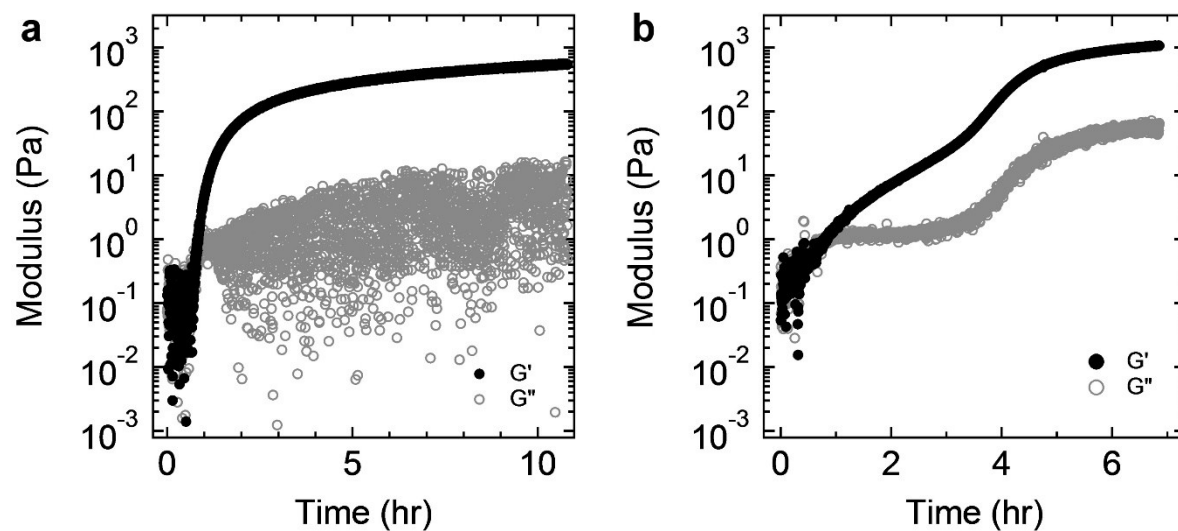

**Figure S2** The evolution of shear moduli during alginate gel formation. **a)** chemical alginate with  $[AAD] \approx 10$  mM and **b)** ionic alginate with  $[Ca^{2+}] \approx 12.5$  mM. The measurements were performed at strain amplitude  $\gamma_0 = 0.1\%$  and  $\omega = 1$  rad/s. The alginate concentration was 1% wt.

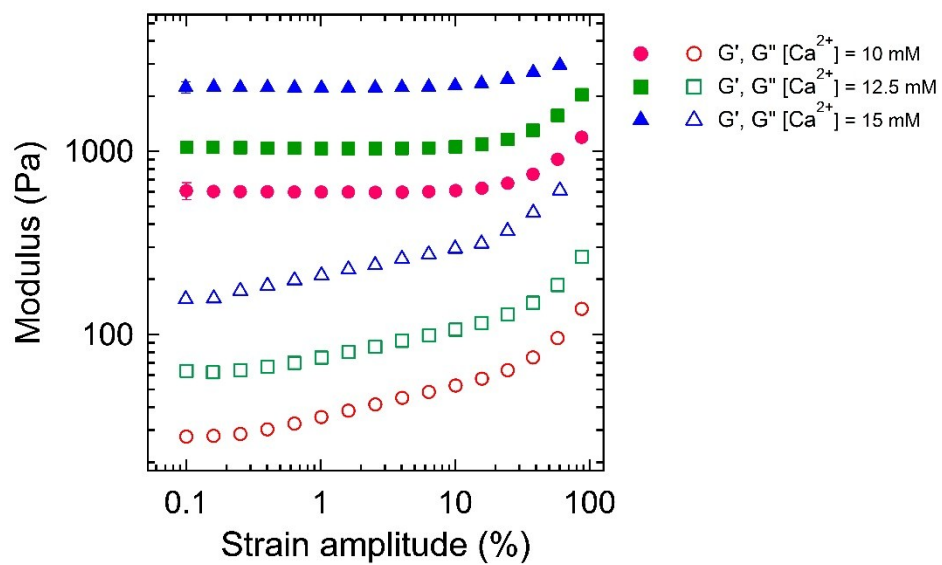

**Figure S3** LAOS measurements on ionic alginate gels with different calcium [Ca<sup>2+</sup>] concentration.

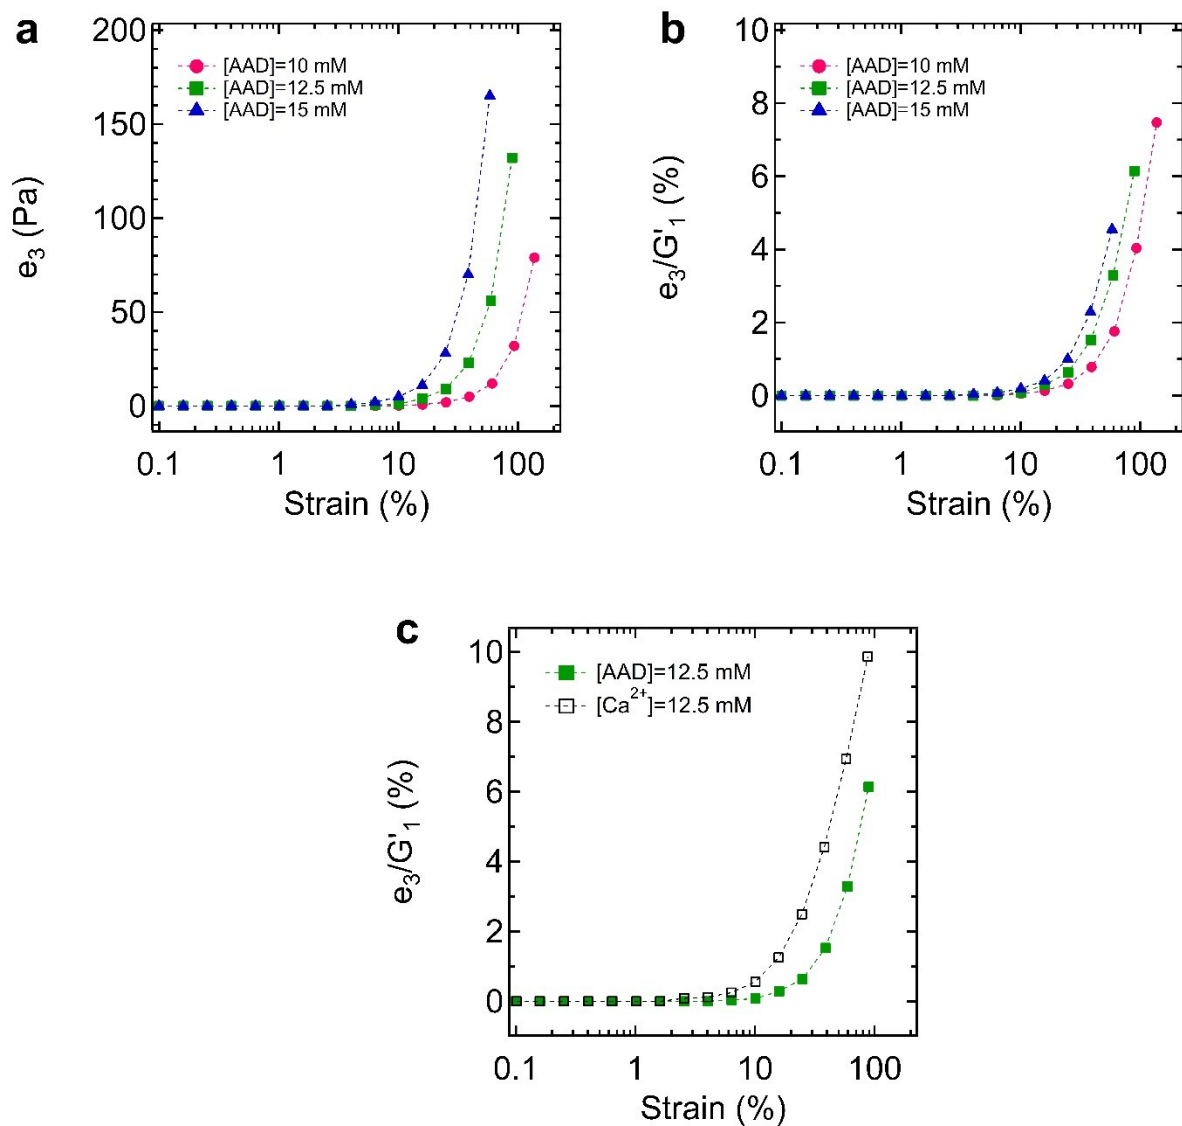

**Figure S4** Estimated Chebyshev coefficients (first  $e_1$ , and third,  $e_3$ ) from stress-strain data during LAOS tests.  $e_1$  is same as  $G'_1$  presented Figure 4a. **a**  $e_3$  and **b**  $e_3/G'_1$  for chemical alginate gels with different AAD concentration. **c**  $e_3/G'_1$  comparing ionic vs chemical alginate gels for crosslinker concentration of 12.5 mM.

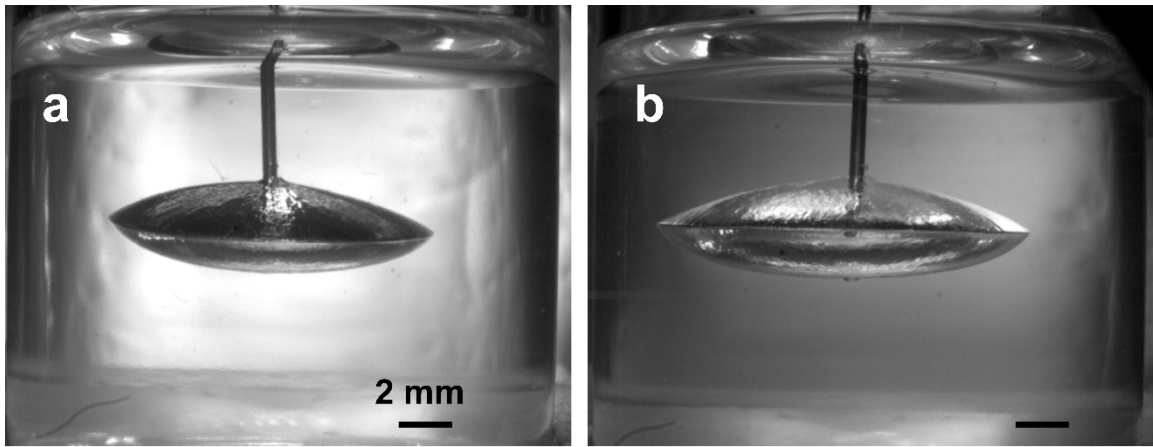

**Figure S5** Ellipsoid shape cavities formed during cavitation rheometry in ionic alginate gels with  $[\text{Ca}^{2+}]$  of **a** 12.5 mM, and **b** 15 mM.
